# Supplementary material
Source: PubMed Central journal article supplement (PMC3926043)
Supplement: 1322691111_sapp.pdf [file 1322691111_sapp.pdf]

# **A critical role for IL-1 $\beta$ in DNA damage-induced mucositis**

Naama Kanarek, Sergei Grivennikov, Michael Leshets, Audrey Lasry, Irit Alkalay, Elad Horwitz, Yoav D. Shaul, Matthew Stachler, Elena Voronov, Ron N. Apte Michele Pagano, Eli Pikarsky, Michael Karin, Sankar Ghosh, and Yinon Ben-Neriah

Supplementary Figures

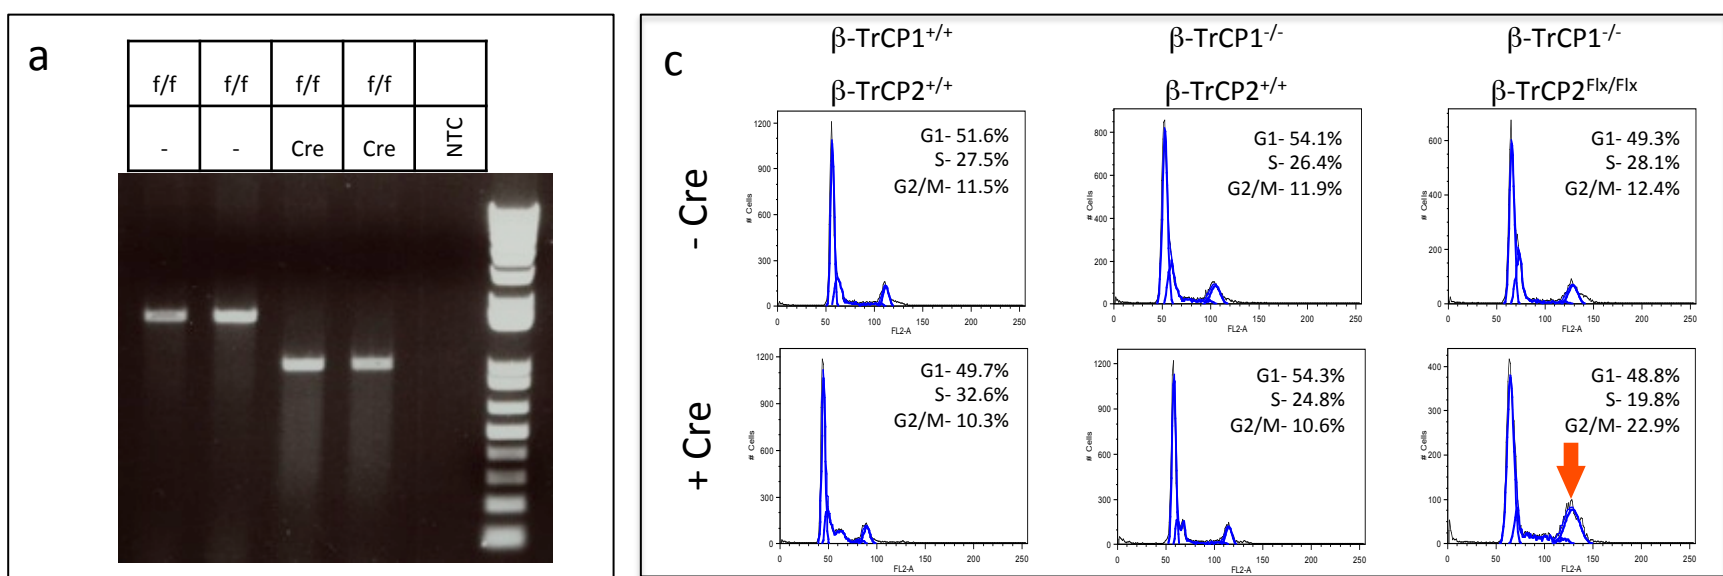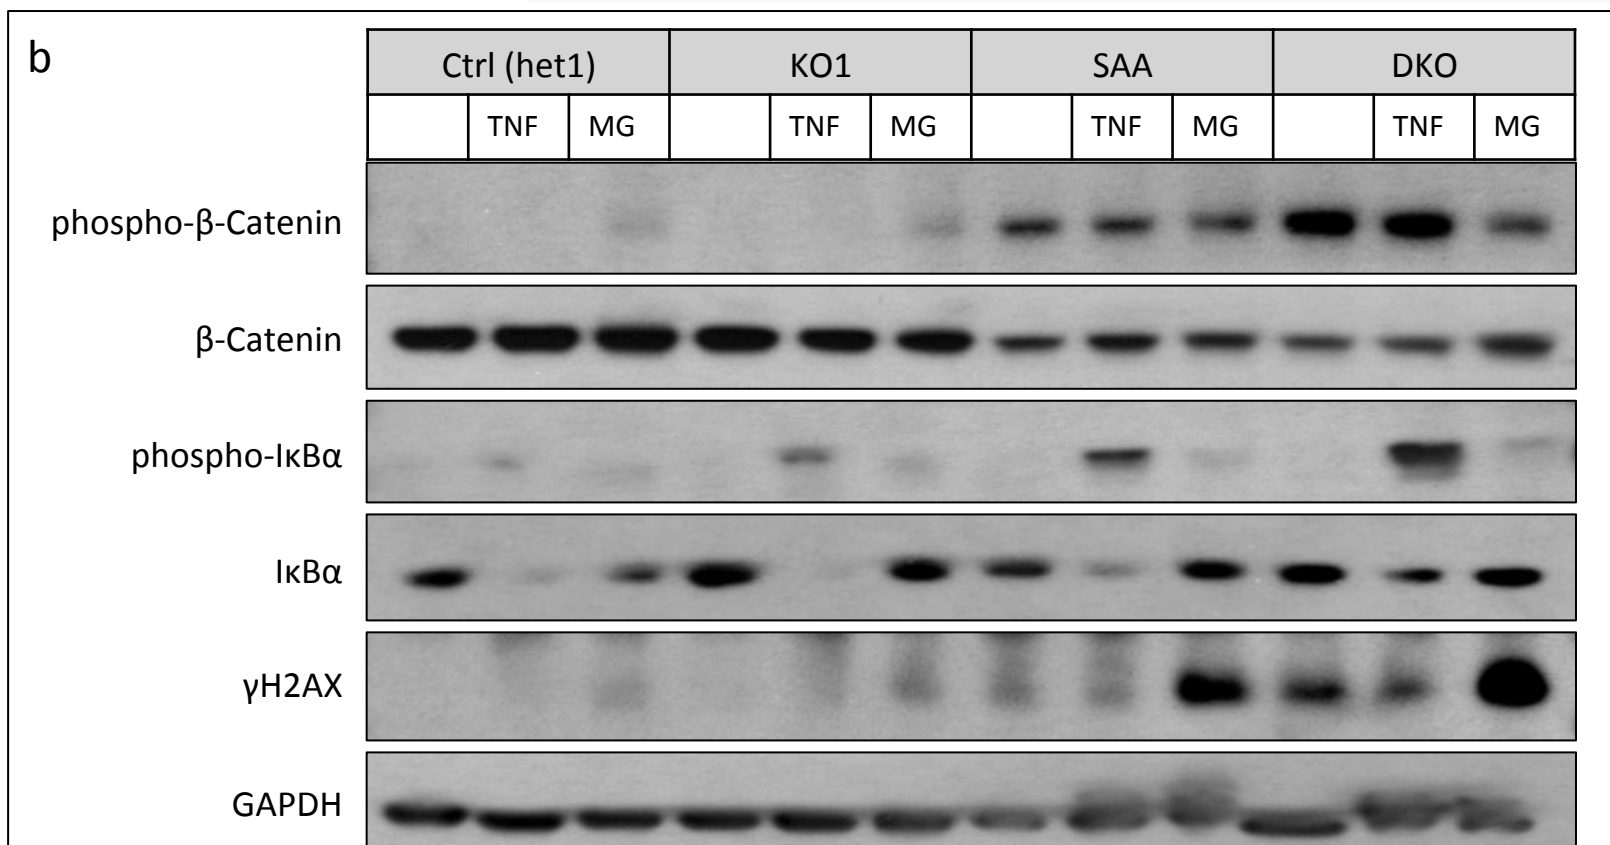

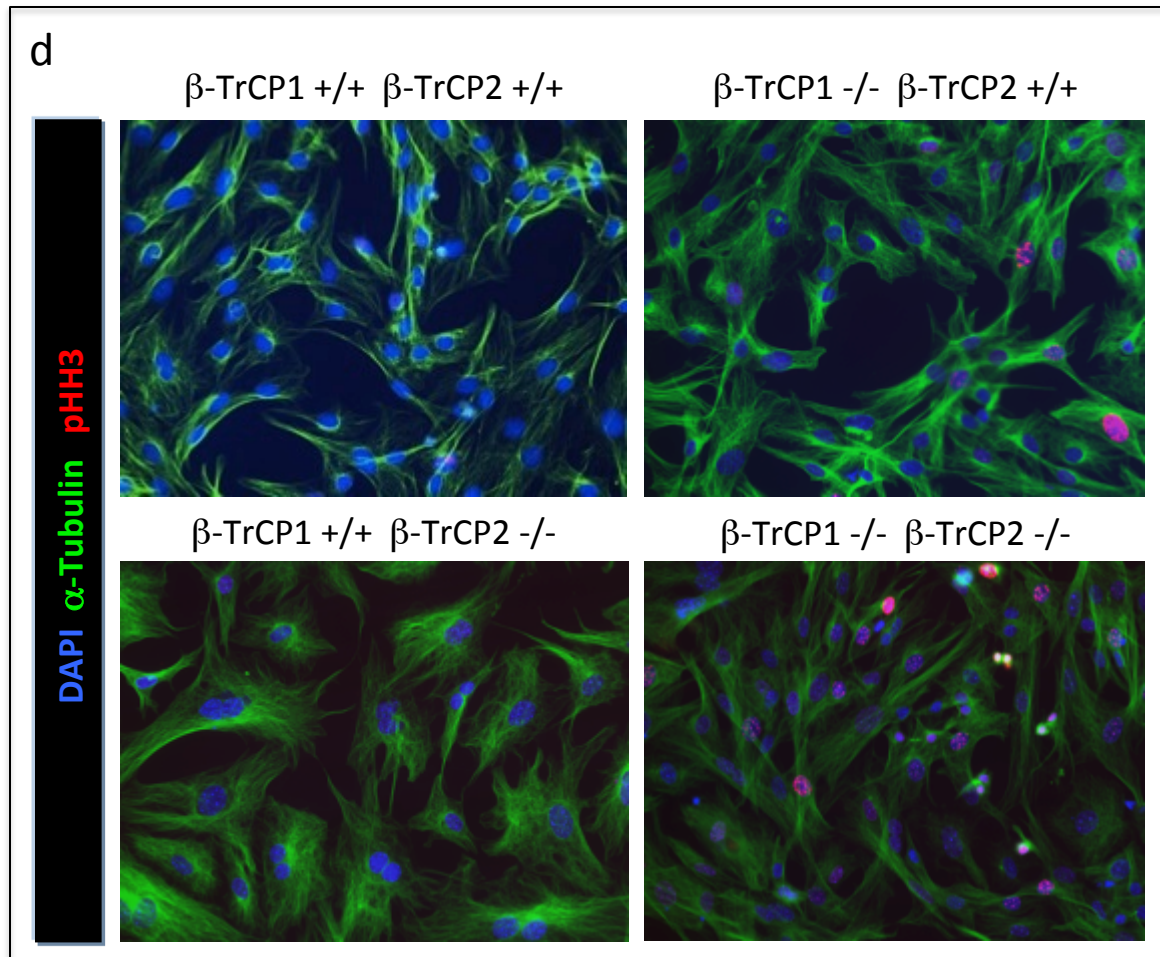

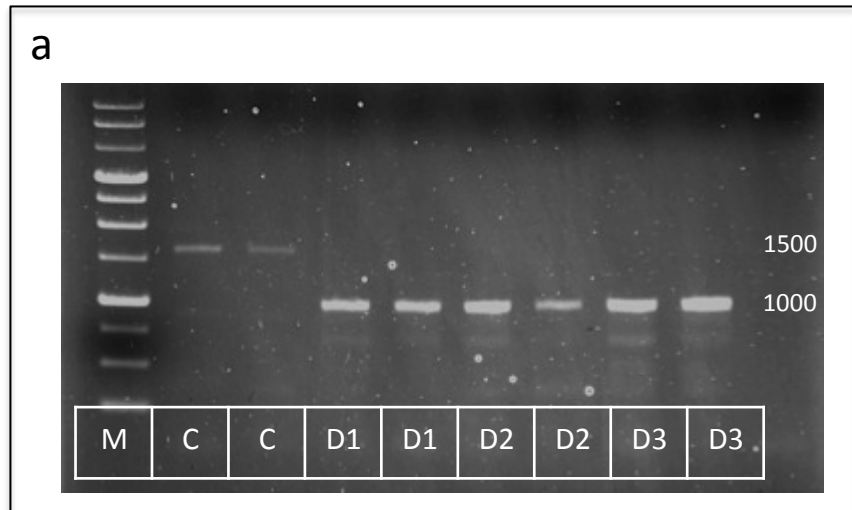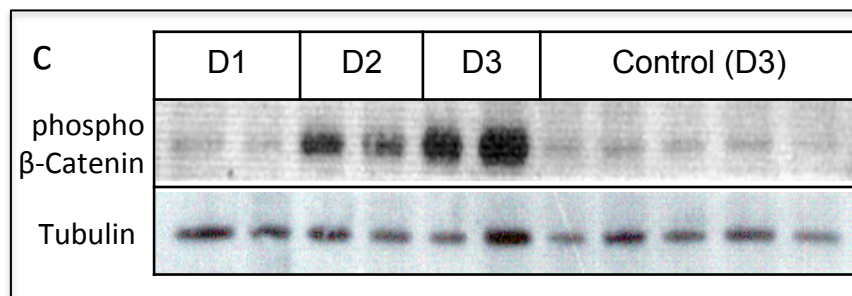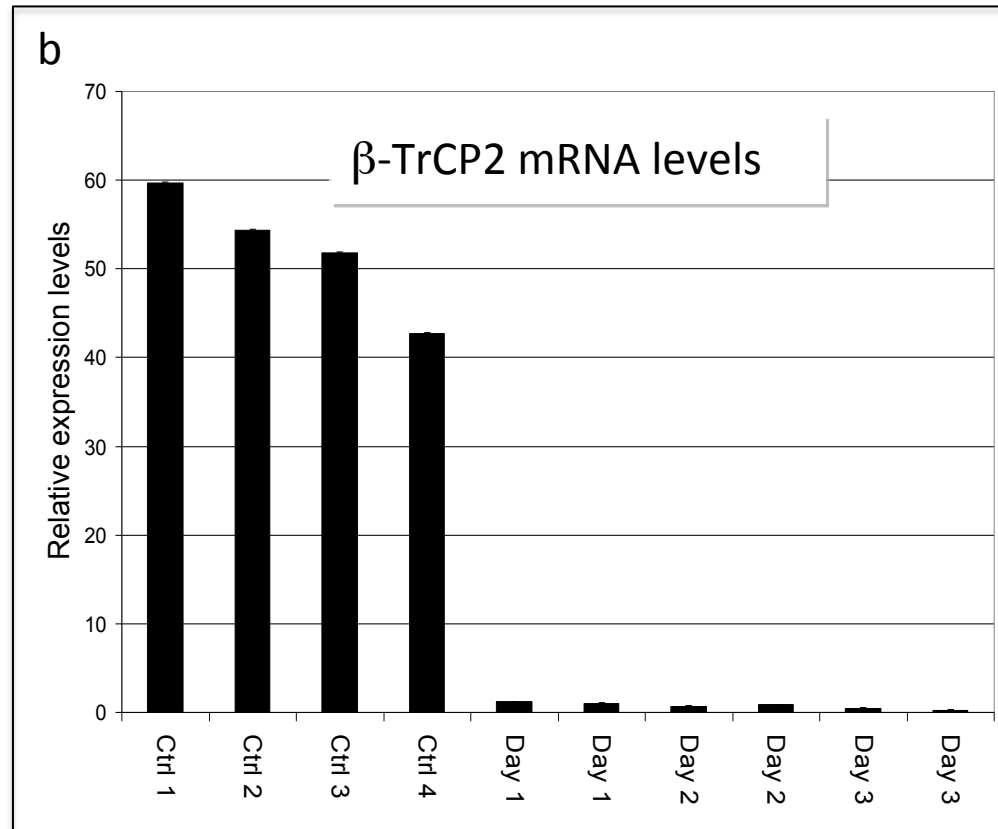

a

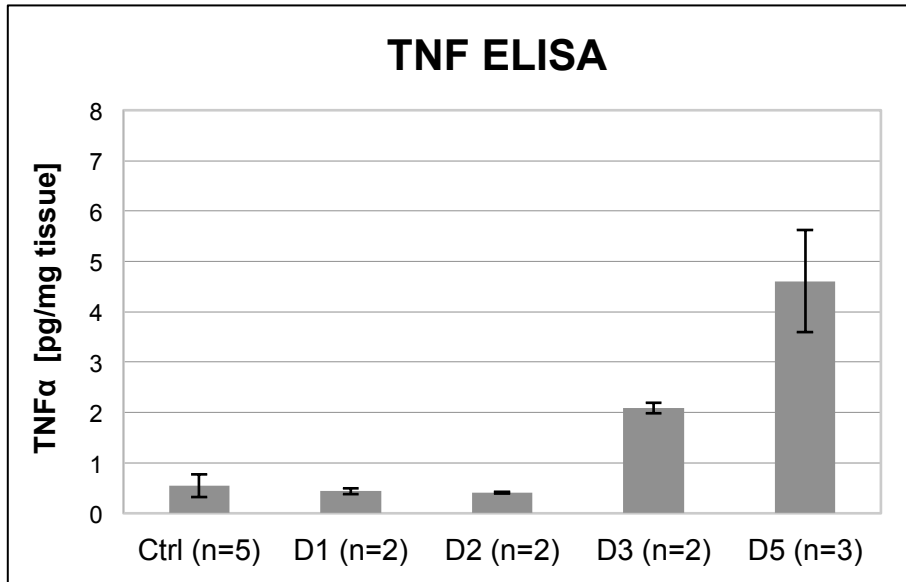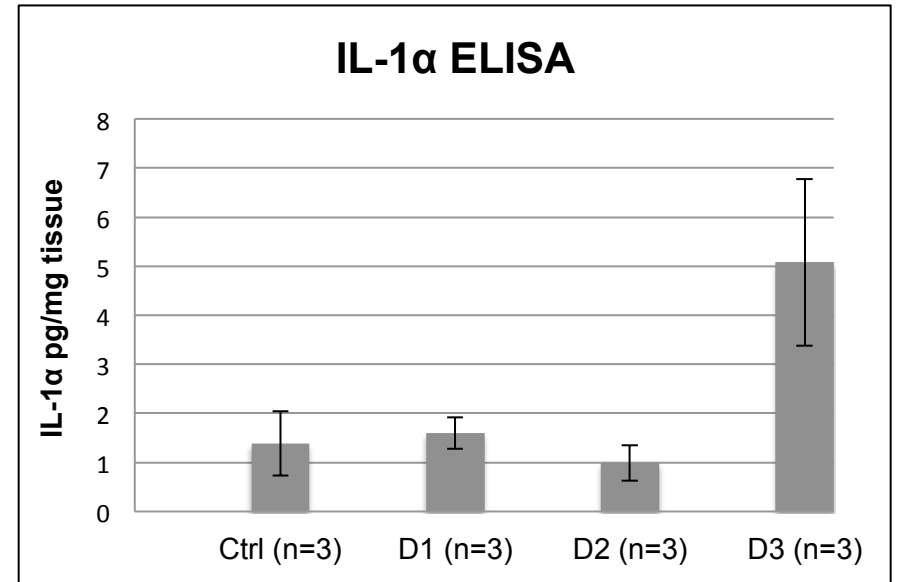

b. Anti-TNF treatment (Enbrel)

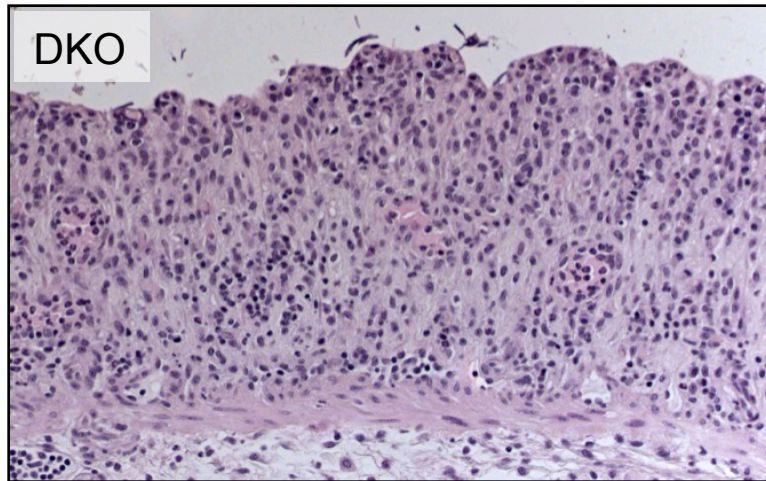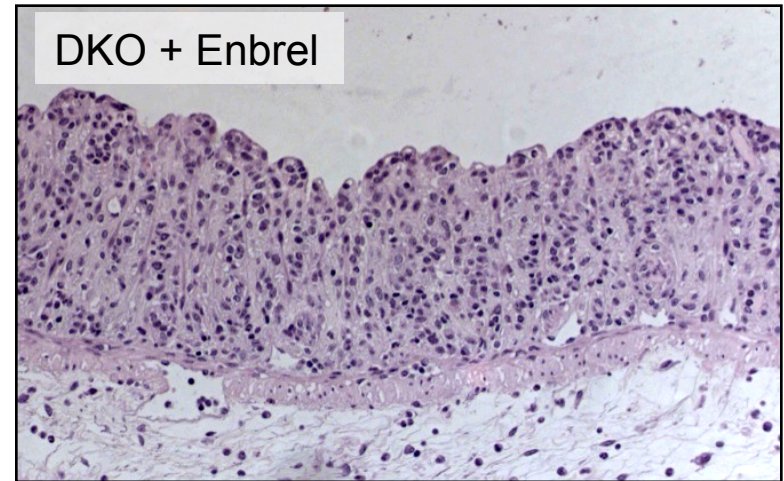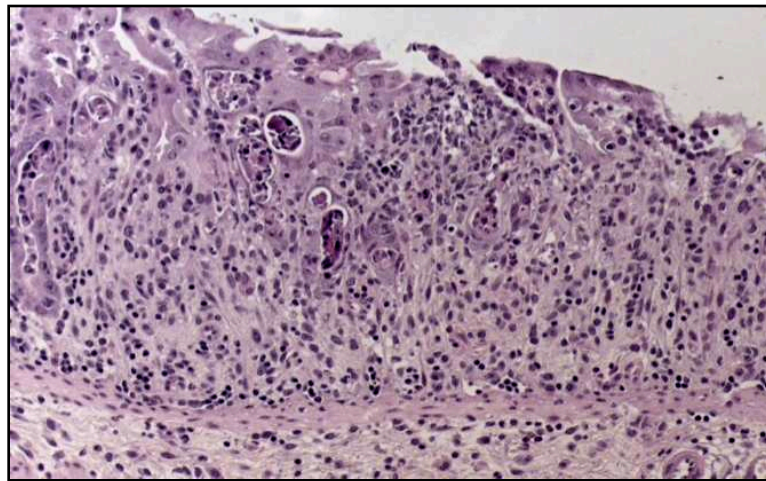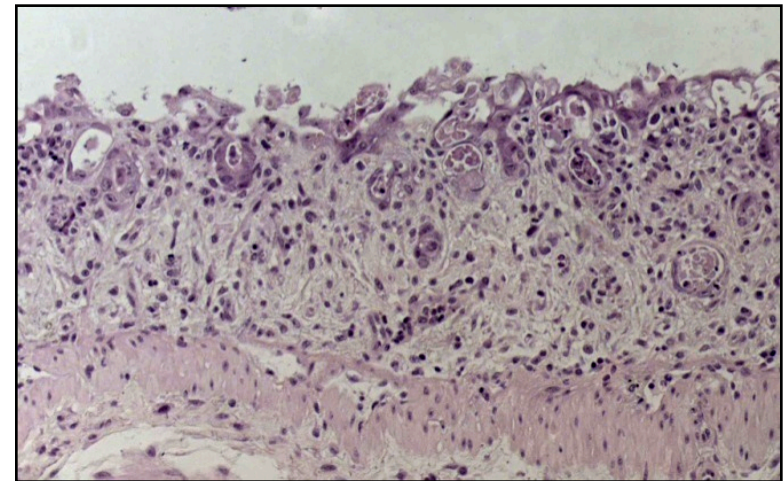

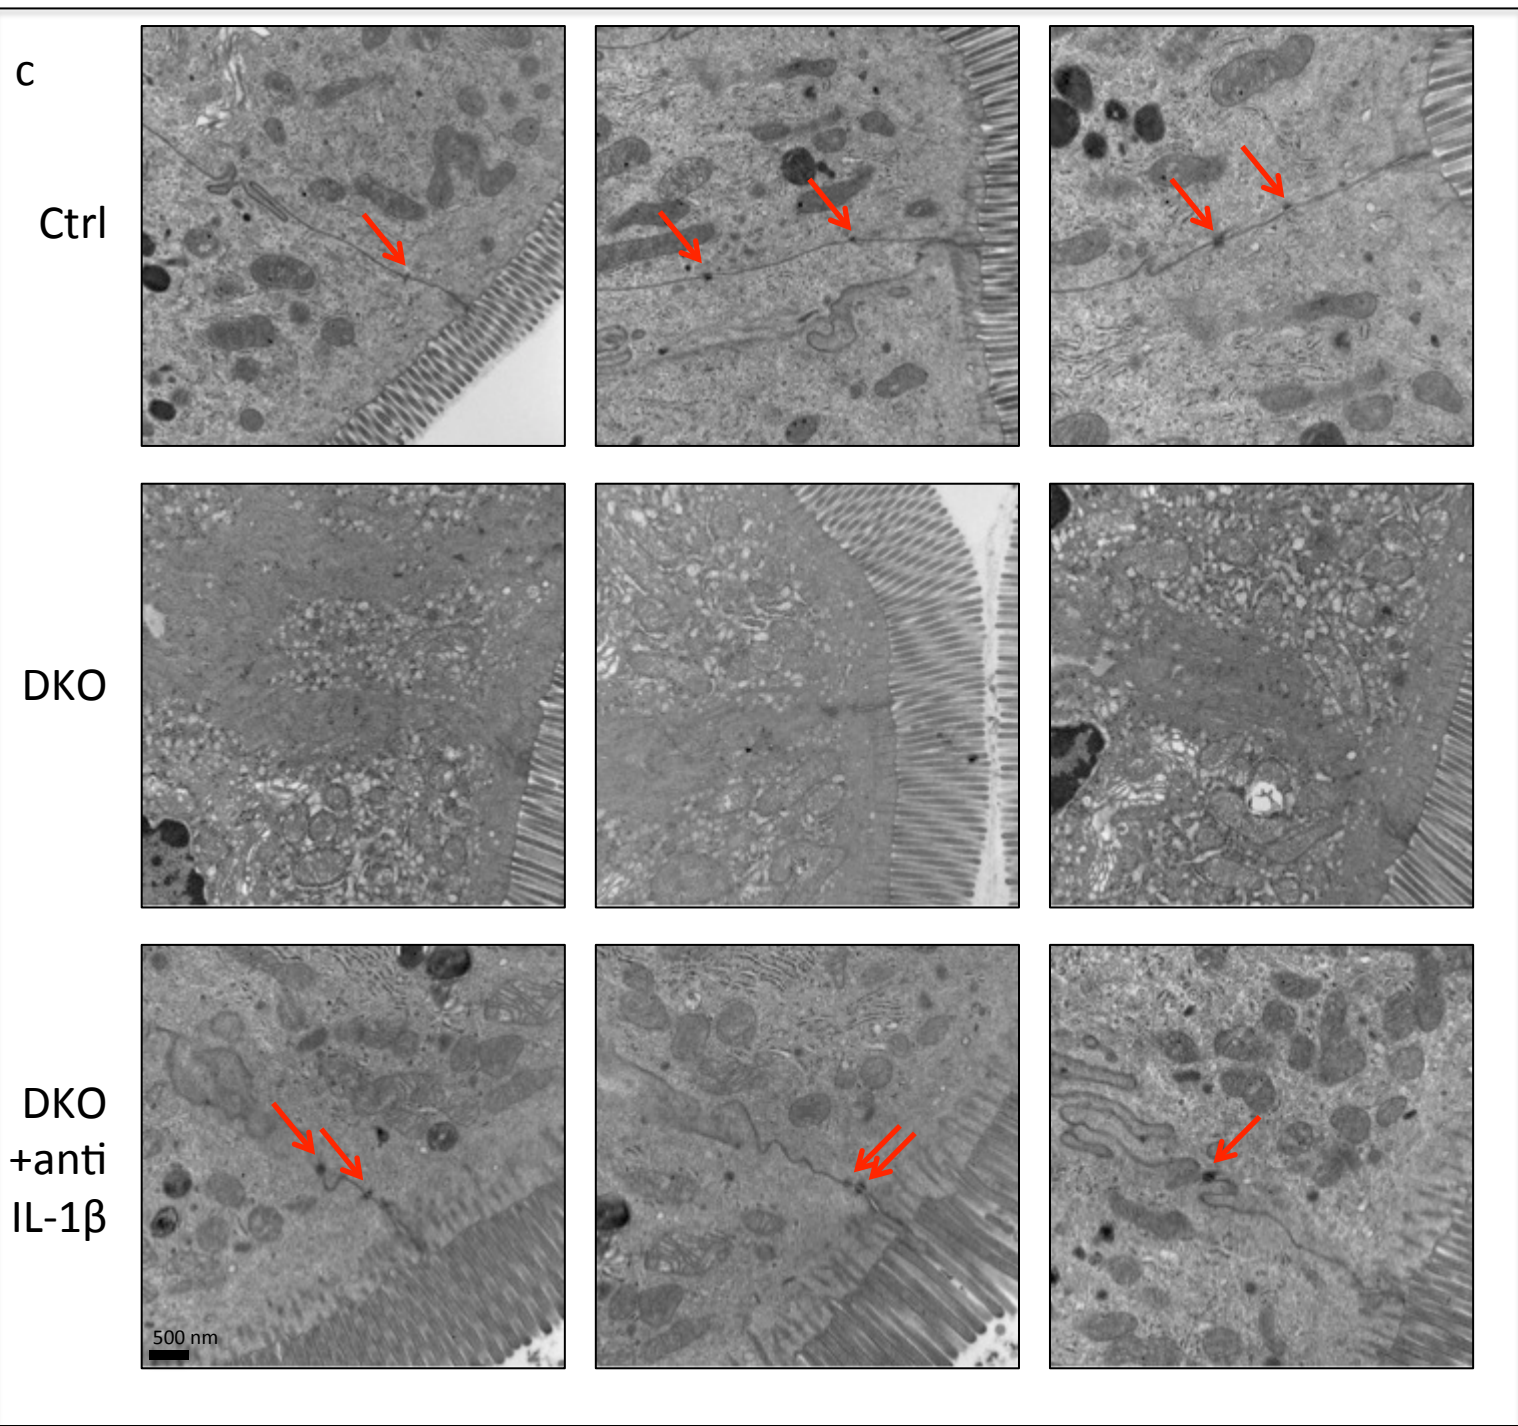

Supp  
Fig. 4

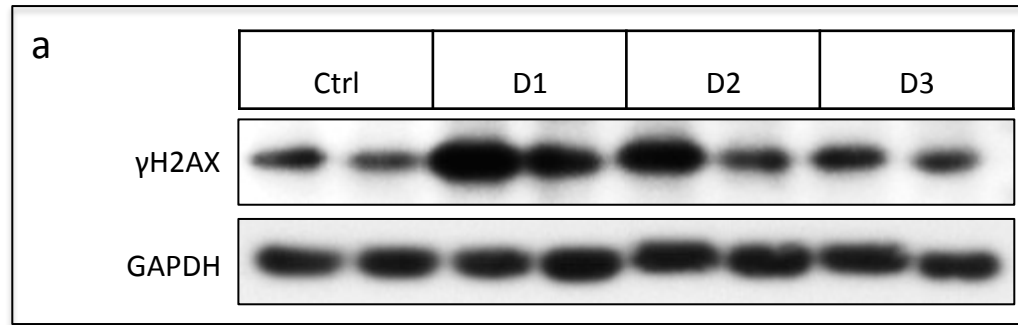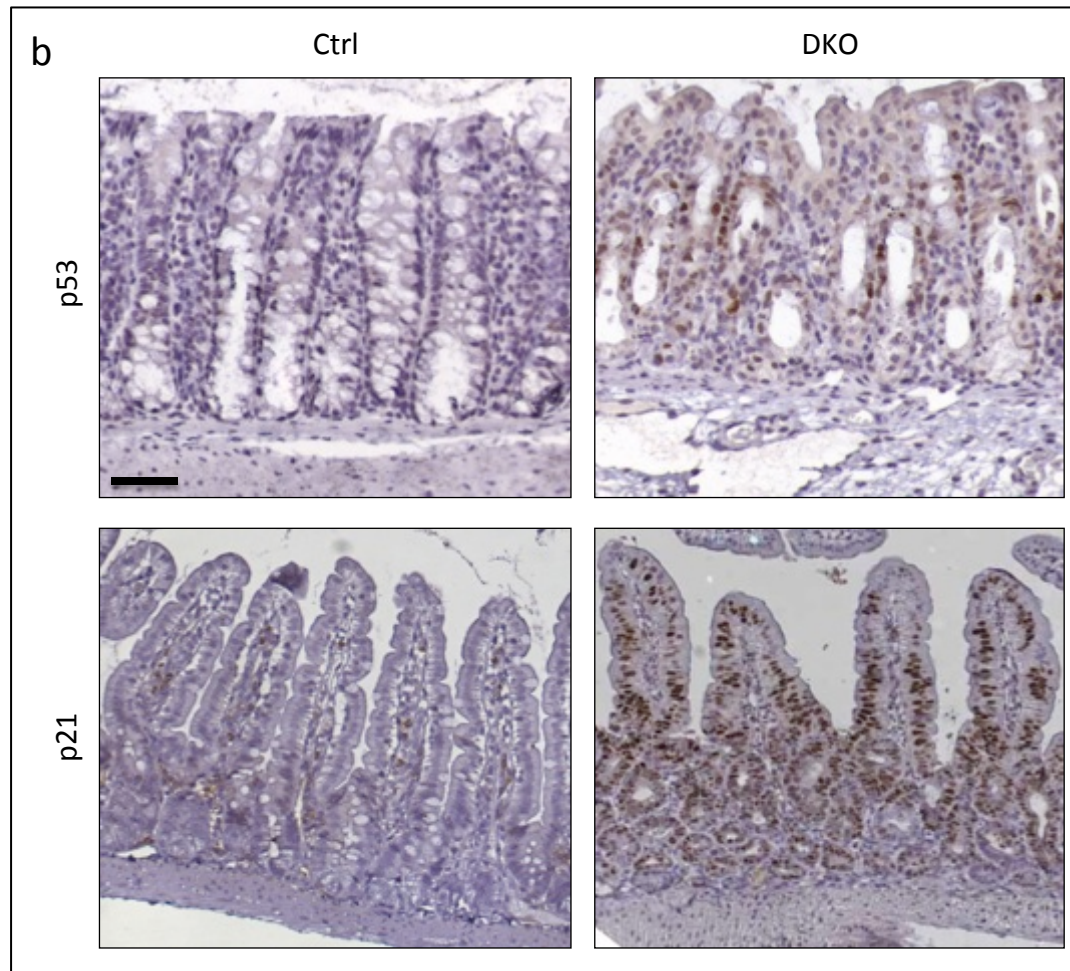





Supp  
Fig. 6

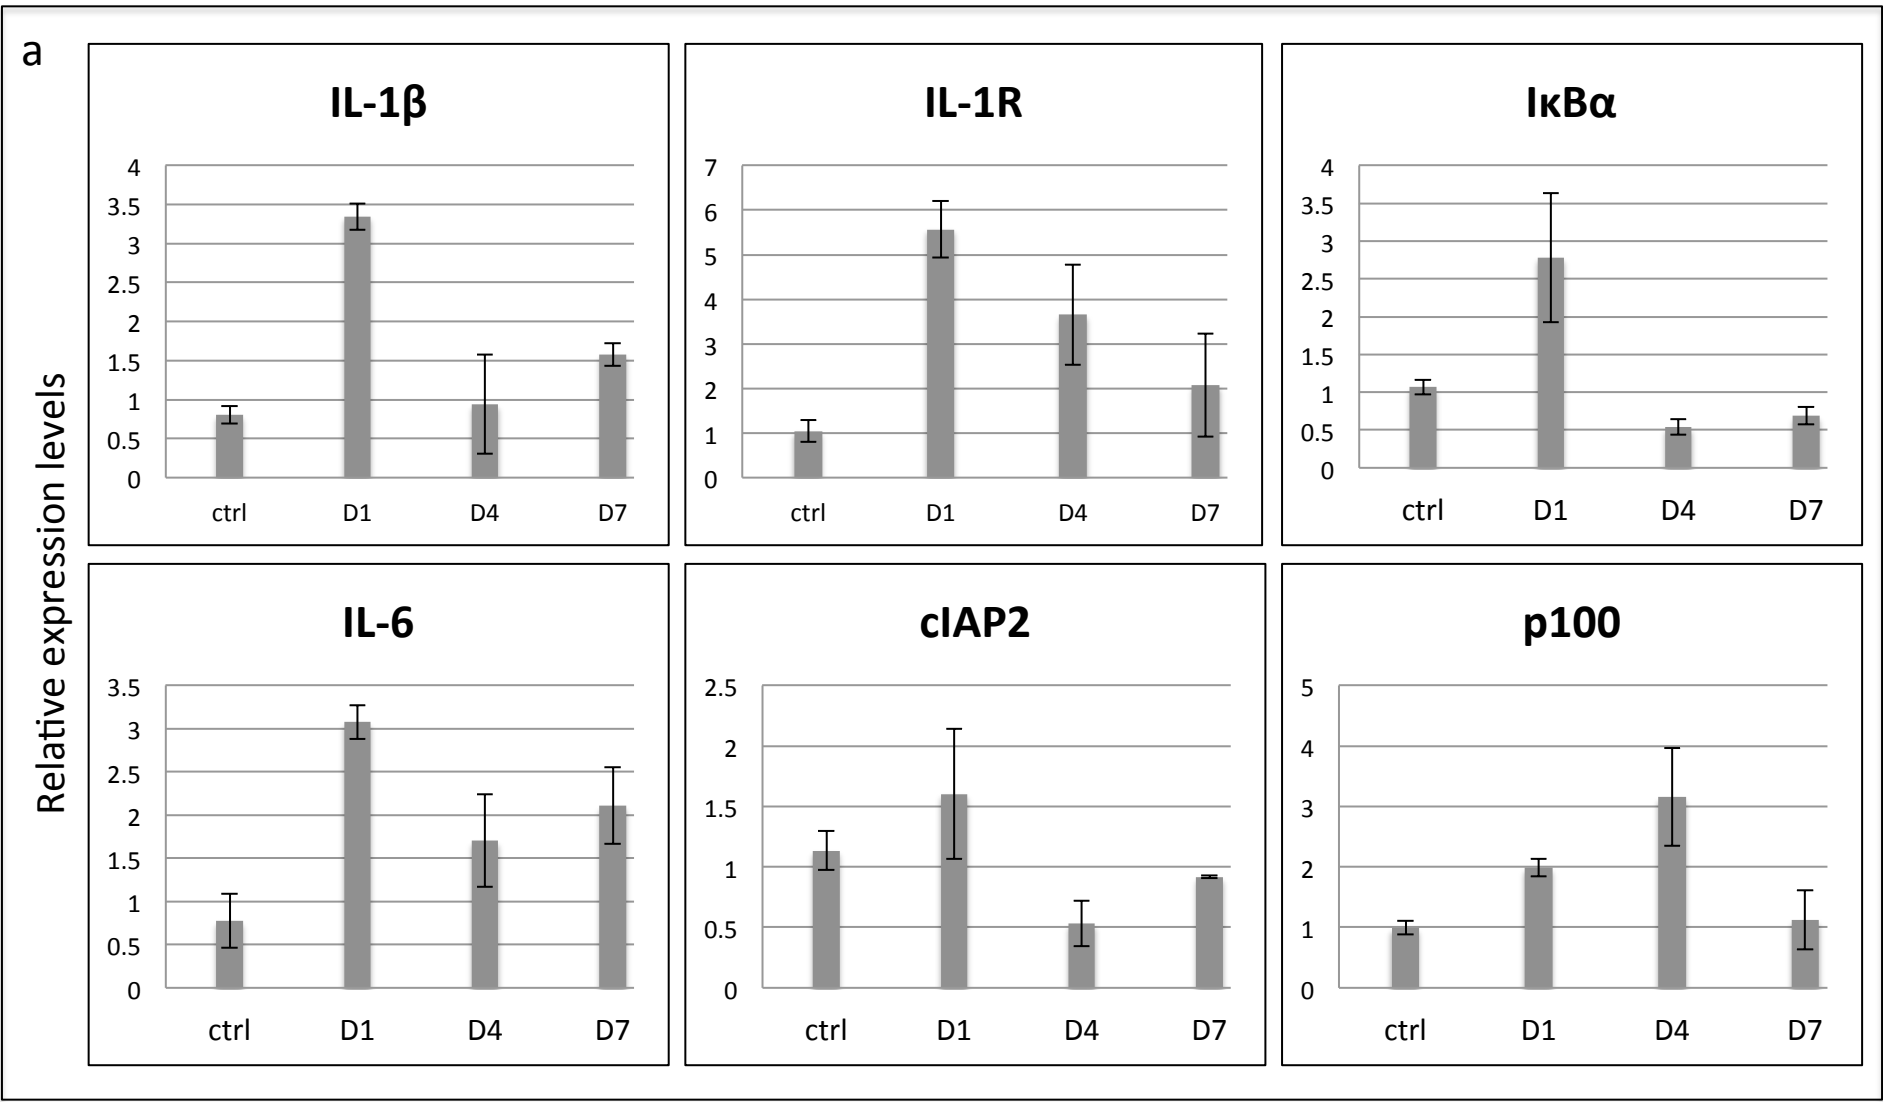

b

ctrl

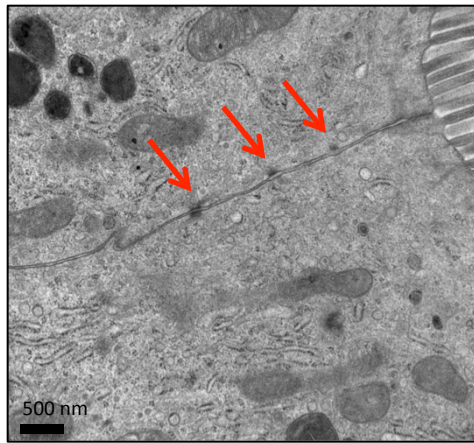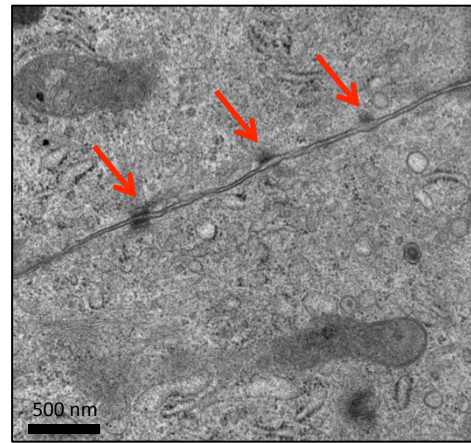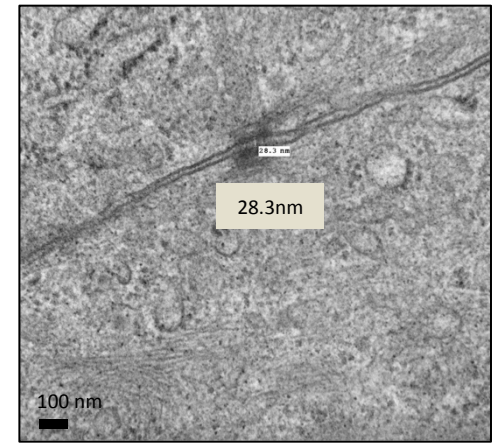

SAA

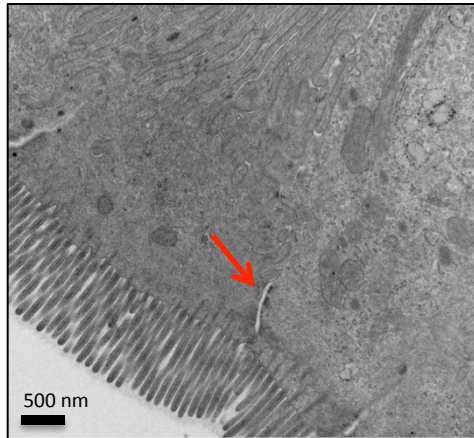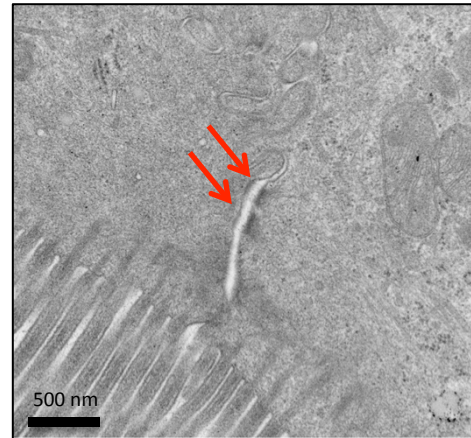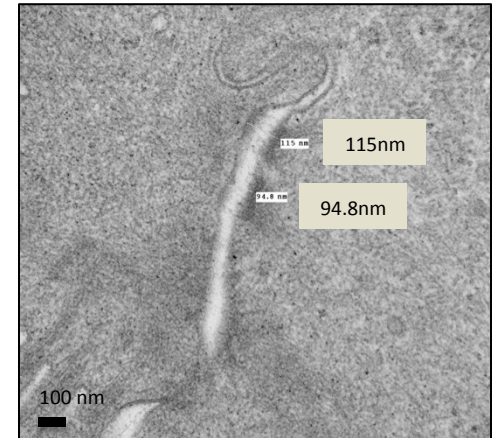

SAA  
+anti  
IL-1 $\beta$

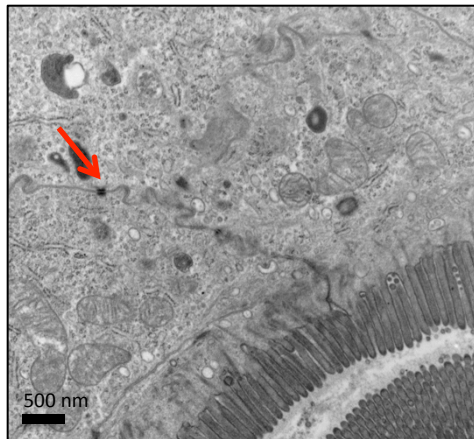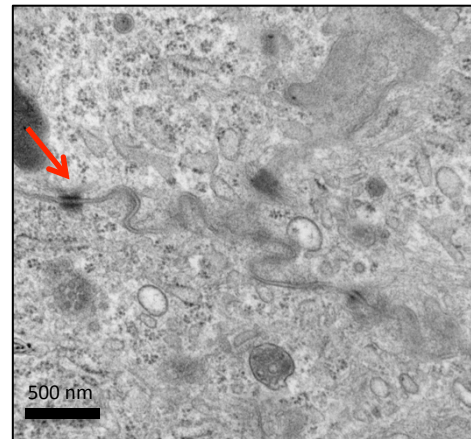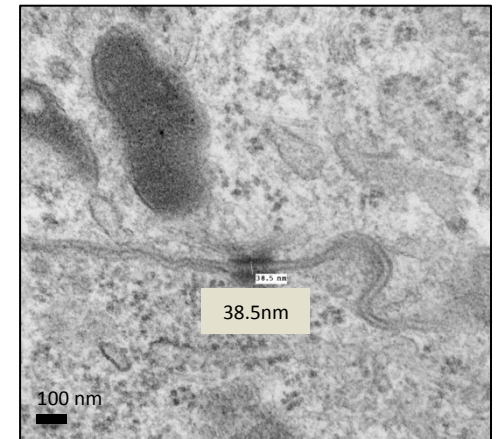

c

Ctrl

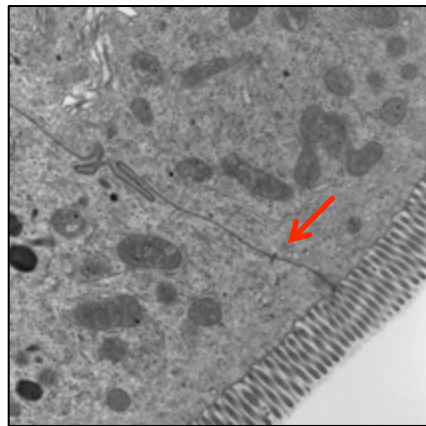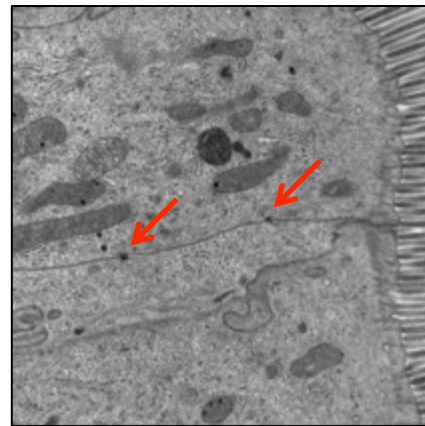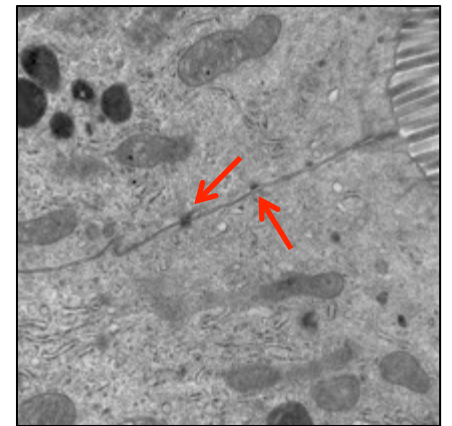

SAA

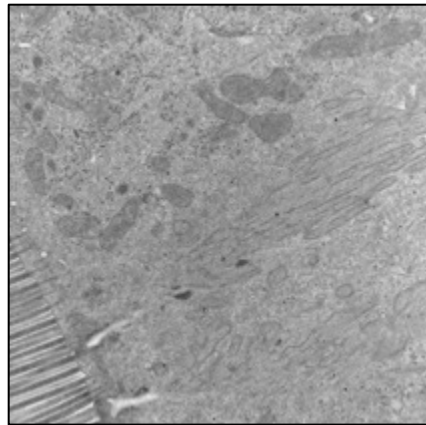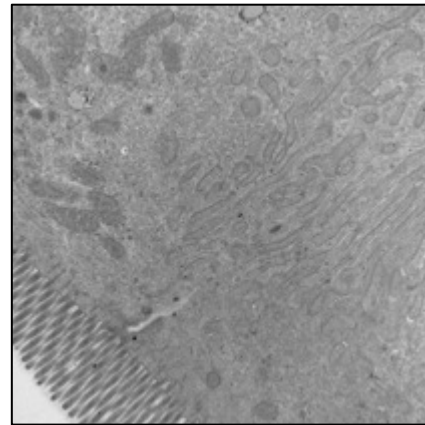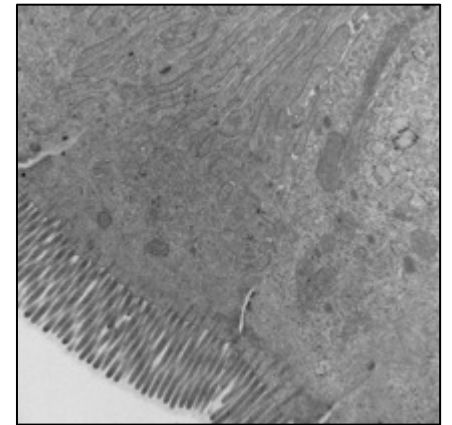

SAA  
+anti  
IL-1 $\beta$

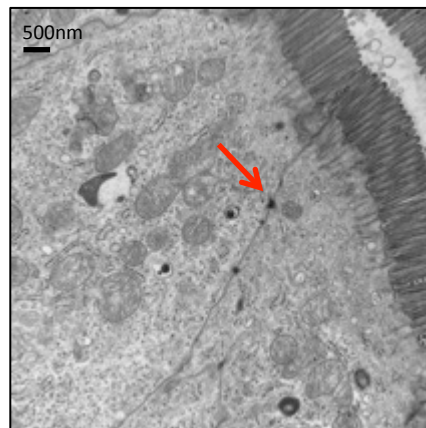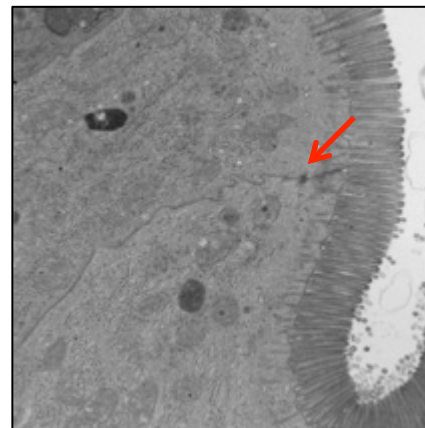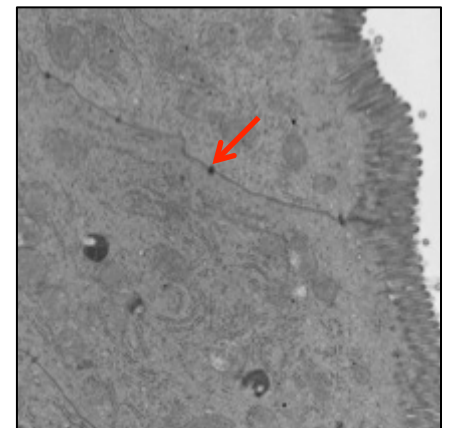

d

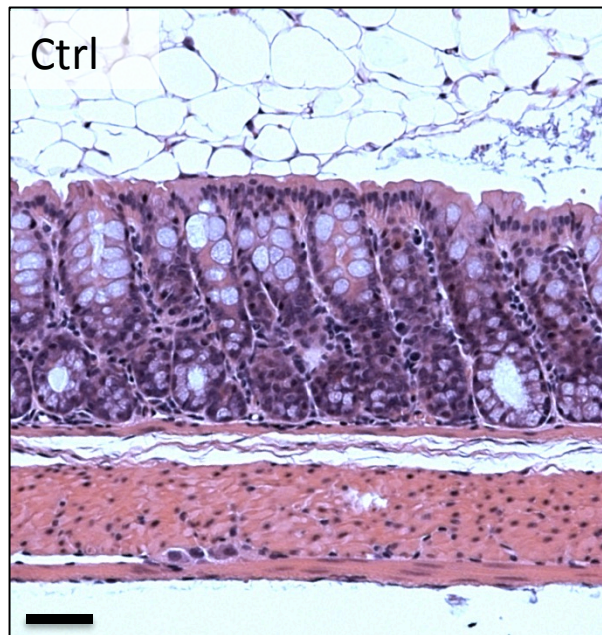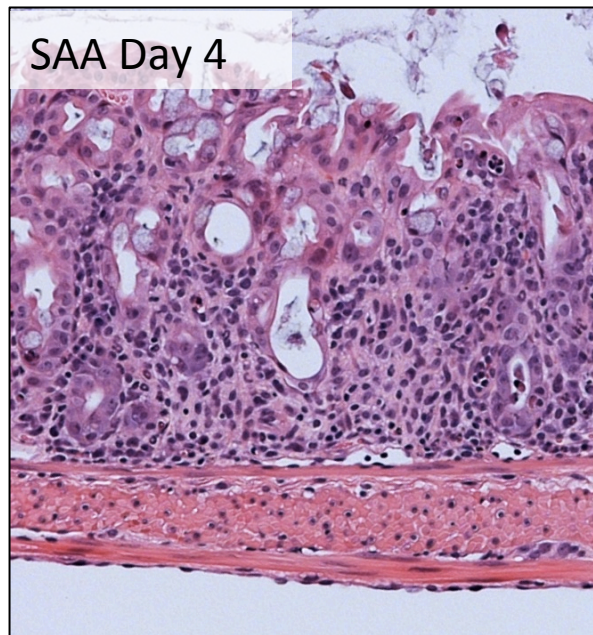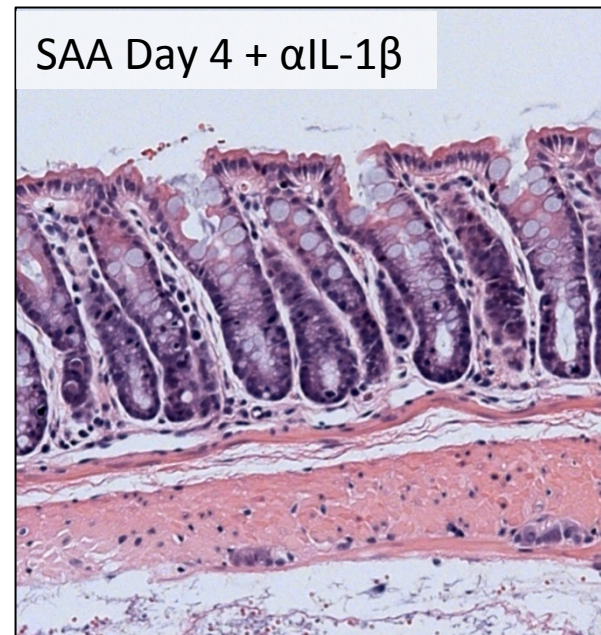

e

Ctrl

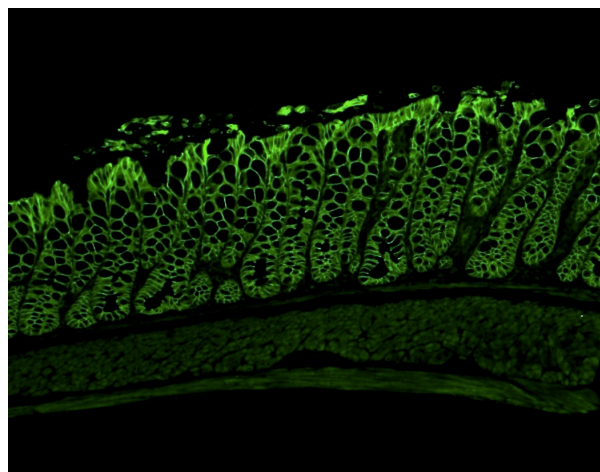

SAA Day 4

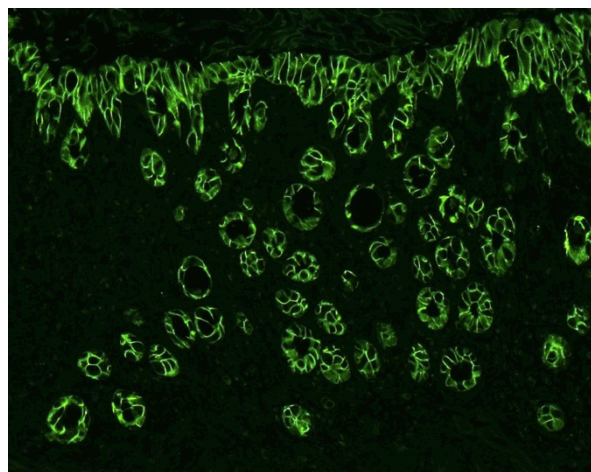

SAA Day 4 +  $\alpha$ IL-1 $\beta$

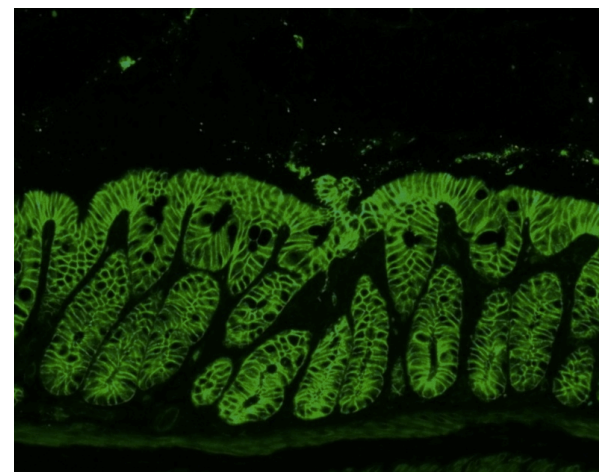

## Supplementary Figure legend

### Supplementary Fig. 1

- a.  $\beta$ -TrCP2 knockout validation by PCR. Exon 4 is flanked by Flox sequences and is deleted following Adeno-Cre infection ( $10^6$  MOI, 48 hours) of  $\beta$ -TrCP2<sup>ff</sup> MEFs. Undeleted band is 1500bp, deleted band is 1000bp. Table upper row indicates  $\beta$ -TrCP2 MEF genotype, lower row indicates Adeno-Cre infection.
- b. Western blot analysis of phosphorylated  $\beta$ -catenin and phosphorylated I $\kappa$ B $\alpha$ ,  $\beta$ -TrCP's bona fide substrates. MEF analyzed are Ctrl (Het1–  $\beta$ -TrCP1<sup>+/-</sup>,  $\beta$ -TrCP2<sup>ff</sup>, no Cre), KO1 ( $\beta$ -TrCP1<sup>-/-</sup>,  $\beta$ -TrCP2<sup>ff</sup>, no Cre), SAA (single active allele -  $\beta$ -TrCP1<sup>+/-</sup>,  $\beta$ -TrCP2<sup>ff</sup>, Cre), DKO ( $\beta$ -TrCP1<sup>-/-</sup>,  $\beta$ -TrCP2<sup>ff</sup>, Cre). MEFs were either left untreated, TNF treated (10nM, 15 minutes) or MG132 treated (10nM, 3.5 hours). Phosphorylated  $\beta$ -catenin and phosphorylated I $\kappa$ B $\alpha$  stabilized upon Cre-dependent deletion of  $\beta$ -TrCP2 on the background of  $\beta$ -TrCP1<sup>+/-</sup> (SAA) and more so when  $\beta$ -TrCP1 was completely absent (DKO). Fifth panel from top – western blot analysis of the DNA damage marker  $\gamma$ H2AX. DNA damage is detected in SAA MEFs following MG132 treatment and in DKO MEFs. Bottom panel – GAPDH, loading control
- c. FACS analysis of Propidium Iodide stained MEFs with the indicated genotypes. Cell count of G2/M MEFs is 2 fold higher in DKO cell population compared with controls.
- d. IF of the mitotic marker pHH3 (red) reveals high numbers of mitotic cells in the DKO MEF population and  $\alpha$ -Tubulin (green) discloses aberrations in the DNA-spindles axis. DNA is stained in blue by DAPI.

### Supplementary Fig. 2

- a. PCR results distinguish between  $\beta$ -TrCP2 undeleted allele (1,500bp) and exon 4-deleted allele (1,000bp). C = control mice ( $\beta$ -TrCP1<sup>+/-</sup>,  $\beta$ -TrCP2<sup>ff</sup>, no Cre), 72 hours after Tamoxifen injection. D1, D2, D3 = DKO ( $\beta$ -TrCP1<sup>-/-</sup>,  $\beta$ -TrCP2<sup>ff</sup>, Villin-Cre-ER<sup>T2</sup>), 24, 48 and 72 hours after Tamoxifen injections, respectively. No trace of the undeleted allele in

Day 1 DKO mice indicates full deletion of exon 4 as soon as 24 hours after knockout induction.

- b. qPCR of enterocytes from the indicated mice; Control mice were injected with Tamoxifen but harbor no Cre. Days 1,2,3, are 24, 48 and 72 hours after Tamoxifen injection. The deletion of exon 4 induced by Tamoxifen injection results in a truncated, unstable RNA product.
- c. Western blot analysis of phosphorylated  $\beta$ -catenin, a well known substrate of  $\beta$ -TrCP. Samples were produced from enterocytes isolated from DKO mice 24, 48 and 72 hours after Tamoxifen injection and Control mice, 72 hours after injection.  $\beta$ -catenin is stabilized in enterocytes around 48 hours after knockout induction

### Supplementary Fig. 3

- a. TNF (left chart) and IL-1 $\alpha$  (right chart) ELISA on intestinal samples of the indicated mice. An increase in TNF and IL-1 $\alpha$  levels is observed only three days after knockout induction and is probably a later outcome of the inflammation rather than the initial cause for the barrier disruption.
- b. Colon H&E staining of DKO mice treated (right panel) and untreated (left panel) with anti TNF regimen (Enbrel, or in its generic name - etanercept). The treatment had no preventive effect on the mucosa.
- c. Aberrant tight junctions in DKO mice captured by electron microscopy. Additional mice for each group (control, DKO and DKO treated with neutralizing  $\alpha$ IL-1 $\beta$  antibody) described in Fig. 3G. Original magnification X20,000. Red arrows indicate tight junctions.

### Supplementary Fig. 4

- a. Western blot analysis of  $\gamma$ H2AX isolated enterocytes from the same mice as in Fig. 3A. A clear increase in  $\gamma$ H2AX at day 1 that diminishes at days 2 and 3 possibly due to loss of  $\gamma$ H2AX-positive dying cells in sample preparation procedure. GAPDH - loading control.
- b. IHC reveals plentiful p53 (top right panel) and p21 (bottom right panel) positive cells in DKO intestines signifying DNA damage response in

these cells. Left panel – intestinal sections from control mice. Scale bar=100µm.

### Supplementary Fig. 5

- a. SW480 cells were pretreated with 10nM MG132 for 4 hours and then treated with either Doxorubicin or LPS for the indicated times. Proteasome was inhibited and no NF-κB dependent transcription was permissible following MG132 treatment as indicated by the absence of LPS induced TNF elevation (left chart). However, inhibition of NF-κB activation by MG132 did not block DNA-damage induced transcriptional induction of IL-1β (right chart).
- b. SW480 cells were transfected with siRNA targeting IKKβ (Darmacon) and 48 hours later were treated with either Doxorubicin or LPS for the indicated time points. IKKβ knockdown efficiency was approximately 60% (left chart), which was sufficient for inhibition of LPS-induced TNF upregulation (middle chart), but did not suppress the elevation in mRNA expression of IL-1β following Doxorubicin-induced DNA damage (right chart). C = control siRNA. IKK = IKKβ siRNA.

### Supplementary Fig. 6

- a. qPCR analysis of NF-κB target genes at days 1, 4 and 7 in enterocytes of SAA mice, showing intact NF-κB response in these mice. n=3 for all groups (P values for Day 1 SAA compared to controls: IL-1β<0.0001, IL-1R=0.0021, IκBα=0.2518, IL-6=0.0024, cIAP2=0.5342, p100=0.0015).
- b. Intestinal tight junctions captured by electron microscopy. Tight junctions (marked by red arrows) appear normal in control (top panel) and abnormal with wide gaps in untreated SAA mice (middle panel). However, SAA mice treated with neutralizing anti IL-1β antibody have normal tight junctions (bottom panel). The left panel magnification is X20,000, middle is X50,000, and right panel's magnification is X100,000. All mice were sacrificed on day1. Distances between



membranes in the tight junctions were measured and the measurements appear next to the junction.

- c.** Additional mice for each group as described for Supplementary Figure 6. b. Aberrant tight junctions in DKO mice captured by electron microscopy. (control, SAA and SAA treated with neutralizing  $\alpha$ IL-1 $\beta$  antibody). Original magnification X20,000. Red arrows indicate tight junctions.
- d.** H&E staining of large intestine of control mouse (left), untreated SAA (middle) and SAA treated with neutralizing anti-IL-1 $\beta$  antibody (right) at day 4 after knockout induction. SAA mice at day 4 show severe inflammation and disrupted epithelial layer. In contrast, following anti IL-1 $\beta$  neutralizing antibody treatment, inflammation is diminished and tissue structure is comparable with control mice. Scale bar = 50 $\mu$ m.
- e.** Immunofluorescence staining of E-cadherin, an epithelial marker, emphasize the difference in the epithelial layer integrity of SAA treated with neutralizing anti-IL-1 $\beta$  antibody (right) and untreated SAA (middle) at day 4 after  $\beta$ -TrCP knockout induction. Control mouse on the left.
